# Supplementary material
Source: publisher figshare collection journal article supplement (https://acs.figshare.com/ndownloader/files/12155345)
Supplement: Supplementary file 1 [file 12155345]

## Sheet: 6 h
Table S3. Proteomic analysis of proteins whose expressions were altered by DHE treatment for key node analysis
Altered protein expressions upon 6 h treatment with DHE (up- or down-regulated by more than 50%, P-value<0.05)
Protein IDs	Protein name	Gene symbol	Peptides	Sequence coverage [%]	Fold change (DHE/control)	p-value
Up-regulated proteins
IPI00217386	Polymerase (RNA) I polypeptide C	POLR1C	5	20.5	1.87504	0.0415867
IPI00788836	Dihydrolipoamide S-acetyltransferase	DLAT	6	22.7	1.53201	0.00875219
Down-regulated proteins
IPI00025273	Trifunctional purine biosynthetic protein adenosine-3	GART	21	34.2	-1.52215	0.0424286
IPI00171844	COP9 signalosome subunit 4	COPS4	11	40.4	-1.54156	0.0237128
IPI00789806	Leucine aminopeptidase 3	LAP3	13	38.7	-1.54544	0.0205054
IPI00218342	Methylenetetrahydrofolate dehydrogenase 1	MTHFD1	32	43.8	-1.55348	0.0465956
IPI00924816	Myotrophin	MTPN	7	81.4	-1.58497	0.0464549
IPI00009771	Lamin B2	LMNB2	12	22.4	-1.59336	0.0132128
IPI00893216	Putative RNA-binding protein LUC7-like 2	LUC7L2	9	28.3	-1.62225	0.0341569
IPI00024933	Ribosomal protein L12	RPL12	6	54.5	-1.63291	0.024592
IPI00028091	ARP3 actin-related protein 3 homolog	ACTR3	12	40.9	-1.68699	0.0202261
IPI00914971	Farnesyl diphosphate synthase	FDPS	8	32.6	-1.69598	0.0343931
IPI00025039	Fibrillarin	FBL	6	25.9	-1.71702	0.0144379
IPI00398067	Uridine monophosphate synthetase	UMPS	3	22.2	-1.77811	0.0296579
IPI00395775	Paraspeckle component 1	PSPC1	7	29.5	-1.78145	0.0221769
IPI00946636	ATPase, H+ transporting lysosomal subunit A1	ATP6V1A	13	32.5	-1.78712	0.00674389
IPI00006167	Protein phosphatase 1G magnesium-dependent gamma isoform	PPM1G	8	26	-1.81235	0.0212535
IPI00007289	Placental alkaline phosphatase	ALPP	12	35.3	-1.83059	0.033388
IPI00922693	Actin beta	ACTB	16	42.3	-1.84597	0.00320469
IPI00917777	Elongation factor Tu GTP binding domain containing 2	EFTUD2	27	42	-1.89922	0.049321
IPI00003886	Guanine nucleotide binding protein-like 3	GNL3	14	32.6	-1.93676	0.0381672
IPI00004795	Chloride channel nucleotide-sensitive 1A	CLNS1A	3	33.5	-1.95027	0.034729
IPI00385834	KH domain containing RNA binding signal transduction associated 1	KHDRBS1	7	17.2	-1.98975	0.00817458
IPI00514831	RNA binding motif protein 39	RBM39	13	36.2	-2.00385	0.0140458
IPI00328840	THO complex 4	THOC4	6	36.2	-2.00428	0.0340702
IPI00604566	DNA fragmentation factor 45kDa alpha polypeptide	DFFA	7	33.2	-2.00586	0.0293969
IPI00288941	Nuclear receptor coactivator 5	NCOA5	5	11.6	-2.02691	0.0450758
IPI00744364	Splicing factor arginine-serine rich 7	SFRS7	6	33.9	-2.08158	0.00566844
IPI00002521	Mitochondrial ATPase coupling factor 6	ATP5J	3	44.4	-2.17072	0.0301822
IPI00395462	Huntingtin interacting protein K	C15orf63	2	31.8	-2.19963	0.0238905
IPI00941463	Nucleosome assembly protein 1-like 4	NAP1L4	13	42.1	-2.23879	0.00356384
IPI00418262	Aldolase C fructose-bisphosphate	ALDOC	5	13.5	-2.33746	0.00176787
IPI00024719	Histone acetyltransferase 1	HAT1	8	32.5	-2.33777	0.0311158
IPI00910814	Protein phosphatase 2 regulatory subunit A beta isoform	PPP2R1B	8	21.4	-2.44708	0.0207027
IPI00386533	Eukaryotic translation initiation factor 4 gamma 1	EIF4G1	24	25.7	-2.55702	0.00209386
IPI00456359	Ataxin 2 like	ATXN2L	15	21.3	-2.57116	0.0191448
IPI00013184	ARD1 homolog A N-acetyltransferase	NAA10	7	42.1	-2.69855	0.00697909
IPI00429689	Protein phosphatase 2 catalytic subunit beta isoform	PPP2CB	12	56	-2.7184	0.0090272
IPI00012303	Selenium binding protein 1	SELENBP1	5	18	-2.7652	0.00577265
IPI00647720	Serine arginine repetitive matrix 1	SRRM1	5	9.5	-3.06015	0.0383262
IPI00007058	Coronin actin binding protein 1B	CORO1B	8	29.4	-3.57282	0.00721462
IPI00220797	Endosulfine alpha	ENSA	5	44.4	-4.45004	0.0224917

## Sheet: 10 h
Altered protein expressions upon 10 h treatment with DHE (up- or down-regulated by more than 50%, P-value<0.05)
Protein IDs	Protein name	Gene symbol	Peptides	Sequence coverage [%]	Fold change (DHE/control)	p-value
Up-regulated proteins
IPI00456969	Dynein cytoplasmic 1 heavy chain 1	DYNC1H1	50	15.2	3.82044	0.00260983
IPI00023529	Cyclin-dependent kinase 6	CDK6	7	27.6	2.93691	0.0126301
IPI00216088	Cellular retinoic acid binding protein 2	CRABP2	5	35.5	2.65418	0.00356603
IPI00293242	General transcription factor II I	GTF2I	12	19.2	2.30672	0.00845645
IPI00007928	PRP8 pre-mRNA processing factor 8 homolog	PRPF8	26	16.1	2.14102	0.0307505
IPI00641181	MARCKS-like protein	MARCKSL1	4	49.2	1.8967	0.0245559
IPI00329331	UDP-glucose pyrophosphorylase 2	UGP2	13	35.6	1.6517	0.00815893
Down-regulated proteins
IPI00008708	Ribosomal L1 domain containing 1	RSL1D1	17	36.3	-1.50252	0.0268836
IPI00013297	PDGFA associated protein 1	PDAP1	6	27.1	-1.50495	0.0307109
IPI00027107	Tu translation elongation factor mitochondrial	TUFM	20	54.7	-1.51024	0.0237304
IPI00012066	Poly(rC) binding protein 2	PCBP2	14	66.6	-1.52148	0.0316586
IPI00218993	Heat shock 105kDa-110kDa protein 1	HSPH1	23	40.7	-1.52165	0.00659155
IPI00291093	Polymerase (RNA) II (DNA directed) polypeptide E 25kDa	POLR2E	5	36.7	-1.52948	0.0283088
IPI00022648	Eukaryotic translation initiation factor 5	EIF5	14	33.2	-1.53008	0.0102224
IPI00010090	Glutamate-cysteine ligase modifier subunit	GCLM	3	15.3	-1.53163	0.00183988
IPI00009342	IQ motif containing GTPase activating protein 1	IQGAP1	44	38.6	-1.54215	0.0290857
IPI00025512	Heat shock 27 kDa protein 1	HSPB1	16	87.3	-1.54457	0.0483496
IPI00292020	Spermidine synthase	SRM	12	57.6	-1.55373	0.0393037
IPI00479141	SEC13 homolog	SEC13	8	46	-1.55625	0.0258926
IPI00219005	FK506 binding protein 4 59kDa	FKBP4	22	68.6	-1.55669	0.00470926
IPI00018206	Aspartate aminotransferase 2	GOT2	14	42.1	-1.57912	0.0247367
IPI00941907	Serine-threonine kinase receptor associated protein	STRAP	17	64.3	-1.59098	0.0308974
IPI00429191	Eukaryotic translation termination factor 1	ETF1	12	35.5	-1.5927	0.029547
IPI00303476	ATP synthase H+ transporting mitochondrial F1 complex beta polypeptide	ATP5B	27	73.5	-1.59763	0.00100961
IPI00941900	Calumenin	CALU	11	50.8	-1.60012	0.00326786
IPI00025277	Programmed cell death protein 6	PDCD6	9	66.5	-1.60562	0.00635174
IPI00032406	DnaJ (Hsp40) homolog subfamily A member 2	DNAJA2	9	31.1	-1.60991	0.0259351
IPI00385786	Splicing factor arginine-serine-rich 2	SFRS2	5	23.9	-1.61572	0.0196598
IPI00645329	Retinoblastoma binding protein 4	RBBP4	13	46.3	-1.61645	0.0182248
IPI00553185	Chaperonin containing TCP-1 subunit 3	CCT3	31	64.8	-1.64474	0.00536972
IPI00018342	Adenylate kinase 1	AK1	8	57.7	-1.64719	0.0403532
IPI00215911	APEX nuclease 1	APEX1	10	50.6	-1.65437	0.0324676
IPI00216298	Thioredoxin	TXN	8	64.8	-1.66497	0.0136605
IPI00293867	D-dopachrome tautomerase	DDT	6	55.9	-1.6666	0.0355649
IPI00220528	Small nuclear ribonucleoprotein polypeptide F	SNRPF	4	58.1	-1.66992	0.0476226
IPI00946732	Ribonucleotide reductase M2 polypeptide	RRM2	4	14.9	-1.68162	0.0352291
IPI00642549	RAD23 homolog B	RAD23B	11	41.9	-1.6845	0.00195379
IPI00009368	sideroflexin-1	SFXN1	6	24.8	-1.68967	0.0447645
IPI00215790	Ribosomal protein L38	RPL38	5	50	-1.70047	0.000768957
IPI00023860	Nucleosome assembly protein 1-like 1	NAP1L1	14	68.2	-1.70159	0.0169049
IPI00215637	DEAD box polypeptide 3 X-linked	DDX3X	26	53.6	-1.70463	0.00152502
IPI00003881	Heterogeneous nuclear ribonucleoprotein F	HNRNPF	12	50.8	-1.71312	0.00218322
IPI00217966	Lactate dehydrogenase A	LDHA	25	75.9	-1.73104	0.00144558
IPI00220493	U6 snRNA-associated Sm-like protein	LSM5	2	46.2	-1.75658	0.0322465
IPI00005198	Interleukin enhancer binding factor 2 45kDa	ILF2	11	42.8	-1.7574	0.0128276
IPI00024993	Mitochondrial short-chain enoyl-coenzyme A hydratase 1	ECHS1	10	49.7	-1.77785	0.00748387
IPI00005154	Structure specific recognition protein 1	SSRP1	20	36.5	-1.79445	0.00548896
IPI00395674	Small nuclear ribonucleoprotein polypeptides B and B1	SNRPB	7	25.5	-1.80256	0.00848843
IPI00012772	Ribosomal protein L8	RPL8	9	38.1	-1.82259	0.0456624
IPI00017672	Nucleoside phosphorylase	PNP	16	66.9	-1.82577	0.0464616
IPI00429689	Protein phosphatase 2 catalytic subunit beta isoform	PPP2CB	12	56	-1.83129	0.00883347
IPI00012535	DnaJ homolog subfamily A member 1	DNAJA1	15	46.1	-1.83837	0.00306458
IPI00554681	NADH dehydrogenase (ubiquinone) 1 alpha subcomplex 5 13kDa	NDUFA5	2	36.2	-1.85983	0.0472425
IPI00009901	Nuclear transport factor 2	NUTF2	5	68.5	-1.90022	0.00114815
IPI00008438	Ribosomal protein S10	RPS10	7	43	-1.91333	0.00645591
IPI00816201	Septin 7	SEPT7	11	34.6	-1.91696	0.0122329
IPI00924816	Myotrophin	MTPN	7	81.4	-1.92925	0.0491228
IPI00028006	Proteasome subunit beta type 2	PSMB2	7	39.8	-1.94309	0.033466
IPI00013452	Glutamyl-prolyl-tRNA synthetase	EPRS	43	41.9	-1.94427	0.015061
IPI00658000	Insulin-like growth factor 2 mRNA binding protein 3	IGF2BP3	9	24.9	-1.94443	0.0256184
IPI00013949	Small glutamine-rich tetratricopeptide repeat-containing alpha	SGTA	9	31	-1.95663	0.0107865
IPI00470498	SERPINE1 mRNA binding protein 1	SERBP1	13	36.6	-1.96656	0.013091
IPI00016912	Tetratricopeptide repeat domain 1	TTC1	7	32.9	-1.98429	0.049628
IPI00871174	c-Myc binding protein	MYCBP	4	55.3	-1.98486	0.00386069
IPI00031820	Phenylalanyl-tRNA synthetase alpha subunit	FARSA	9	32.9	-1.98592	0.00705392
IPI00027252	Prohibitin 2	PHB2	6	30.1	-1.99383	0.0422479
IPI00026546	Platelet activating factor acetylhydrolase isoform Ib beta subunit 2	PAFAH1B2	4	26.2	-2.02767	0.00615072
IPI00218493	Hypoxanthine phosphoribosyltransferase 1	HPRT1	9	56	-2.03429	0.0255203
IPI00025815	TAR DNA binding protein	TARDBP	7	29.7	-2.06909	0.0168724
IPI00942408	Cyclin dependent kinase inhibitor 2A	CDKN2A	7	69.9	-2.07343	0.0149968
IPI00065671	Uridine cytidine kinase 2	UCK2	7	41	-2.0814	0.0354285
IPI00008433	Ribosomal protein S5	RPS5	7	35.8	-2.0898	0.0292999
IPI00023919	Proteasome 26S subunit ATPase 5	PSMC5	15	55.2	-2.14221	0.00798518
IPI00023234	Ubiquitin-like modifier activating enzyme 2	UBA2	7	23	-2.15333	0.0274896
IPI00550689	tRNA-splicing ligase RtcB homolog	C22orf28	9	27.5	-2.18939	0.0038233
IPI00017596	Microtubule-associated protein RP-EB family member 1	MAPRE1	12	60.1	-2.2091	0.0230799
IPI00005657	Member of the KE2 gene product family	PFDN6	2	15.5	-2.2095	0.00755006
IPI00019169	SH3 domain GRB2 like 1	SH3GL1	5	20.1	-2.22245	0.0430005
IPI00029012	Eukaryotic translation initiation factor 3 subunit A	EIF3A	26	22.6	-2.24381	0.00175273
IPI00026833	Adenylosuccinate synthetase	ADSS	7	22.4	-2.30124	0.0307189
IPI00954039	Disabled homolog 2 mitogen-responsive phosphoprotein	DAB2	13	30.3	-2.51354	0.000659375
IPI00306708	PDZ binding kinase; binds to TP53	PBK	7	39.1	-2.58997	0.01658
IPI00914026	Dynactin 1	DCTN1	10	14.7	-2.81419	0.00442629
IPI00025796	NADH dehydrogenase (ubiquinone) Fe-S protein 3 30kDa	NDUFS3	9	40.9	-2.97346	0.00247092
IPI00032957	Ubiquitin-conjugating enzyme E2I	UBE2I	7	58.9	-3.00076	0.0209615
IPI00260318	Cyclin dependent protein kinase 2	CDK2	7	38.6	-3.02266	0.0234924
IPI00401072	Proteasome assembly chaperone 1	PSMG1	3	12.4	-3.08118	0.0140905
IPI00645384	Serine-arginine-rich splicing factor 10	FUSIP1	6	38.2	-3.38844	0.0150607
IPI00217816	UDP-N-acteylglucosamine pyrophosphorylase 1	UAP1	6	16	-3.51898	0.00574282
IPI00549389	Methyltransferase like 11A (N-terminal methyltransferase 1)	METTL11A	5	32.1	-3.60835	0.0206503
IPI00922697	Pyruvate dehydrogenase alpha 1	PDHA1	8	35.9	-4.79154	0.00138677

## Sheet: 24 h
Altered protein expressions upon 24 h treatment with DHE (up- or down-regulated by more than 50%, P-value<0.05)
Protein IDs	Protein name	Gene symbol	Peptides	Sequence coverage [%]	Fold change (DHE/control)	p-value
Up-regulated proteins
IPI00217468	H1 histone family member 5	HIST1H1B	5	21.7	11.9418	0.00178335
IPI00453473	Histone cluster 1 H4b	HIST1H4B	8	59.2	11.2316	0.0135301
IPI00878218	ATP synthase H+ transporting mitochondrial F1 complex O subunit	ATP5O	7	44.1	7.36412	0.000684691
IPI00549885	Pyruvate dehydrogenase (lipoamide)-beta	PDHB	11	44.6	6.58711	0.00435949
IPI00010810	Electron-transfer-flavoprotein-alpha polypeptide	ETFA	11	53.2	5.82791	0.020895
IPI00178744	Acyl-Coenzyme A dehydrogenase very long chain	ACADVL	20	42	4.96865	0.00444856
IPI00030363	Acetyl-Coenzyme A acetyltransferase 1	ACAT1	17	51.5	4.52688	0.031899
IPI00011416	Enoyl CoA hydratase 1 peroxisomal	ECH1	8	35.1	3.9416	0.00327486
IPI00012382	Small nuclear ribonucleoprotein polypeptide A	SNRPA	5	28.4	3.88741	0.00757927
IPI00024993	Mitochondrial short-chain enoyl-coenzyme A hydratase 1	ECHS1	10	49.7	3.88145	0.0148096
IPI00419373	Heterogeneous nuclear ribonucleoprotein A3	HNRNPA3	13	41.8	3.81359	0.000688571
IPI00294158	Biliverdin reductase A	BLVRA	6	26.4	3.71664	0.00161017
IPI00291006	Mitochondrial malate dehydrogenase	MDH2	16	59.5	3.64422	0.00100556
IPI00413451	Serpin peptidase inhibitor clade B member 6	SERPINB6	11	30.8	3.64312	0.00172135
IPI00216237	60S ribosomal protein L36	RPL36	4	30.5	3.63428	0.00311843
IPI00015911	Dihydrolipoamide dehydrogenase	DLD	9	30.7	3.61236	0.00594103
IPI00026516	3-oxoacid CoA transferase 1	OXCT1	14	37.5	3.59527	0.0150733
IPI00917949	NGG1 interacting factor 3-like 1	NIF3L1	3	22.5	3.49344	0.00382942
IPI00374151	Peroxiredoxin 3	PRDX3	9	43.7	3.23483	0.0178252
IPI00009315	Acyl-Coenzyme A binding domain containing 3	ACBD3	4	15	3.14076	0.0373197
IPI00029744	Single-stranded DNA binding protein 1	SSBP1	6	52.7	3.13039	3.14276e-05
IPI00789370	Serine hydroxymethyltransferase 2	SHMT2	13	41.4	3.10597	0.0143128
IPI00018206	Aspartate aminotransferase 2	GOT2	14	42.1	3.06786	0.0237047
IPI00908469	Protein with strong similarity to beta-2 tubulin (rat Rgd1309427)	TUBB6	19	64.1	3.05628	0.0205101
IPI00220766	Glyoxalase I	GLO1	10	66.3	3.0171	0.0346901
IPI00007765	Heat shock 70kDa protein 9	HSPA9	34	57.3	3.01331	6.65605e-05
IPI00217465	Histone cluster 1 H1c	HIST1H1C	10	27.7	3.00233	0.00141182
IPI00011062	Carbamyl phosphate synthetase 1 mitochondrial	CPS1	73	65	2.94172	3.42292e-06
IPI00646055	TNF receptor-associated protein 1	TRAP1	20	44.9	2.9368	0.0129778
IPI00917605	Somatic cytochrome c	CYCS	6	58.4	2.90615	0.000194373
IPI00027107	Tu translation elongation factor mitochondrial	TUFM	20	54.7	2.85464	0.00281589
IPI00872909	Nucleolar protein homolog; binds to RNA	NOP2	8	16.2	2.8151	0.00301726
IPI00021728	Eukaryotic translation initiation factor 2 subunit 2 beta	EIF2S2	11	36.9	2.79735	0.0279728
IPI00026519	Peptidylprolyl isomerase F	PPIF	6	40.6	2.79273	0.0124028
IPI00014230	Complement component 1 q subcomponent binding protein	C1QBP	7	33.7	2.77134	0.00137963
IPI00442073	Cysteine and glycine-rich protein 1	CSRP1	8	64.2	2.72106	0.0064413
IPI00011200	Phosphoglycerate dehydrogenase	PHGDH	21	49.5	2.71462	0.00191589
IPI00939523	DEAD (Asp-Glu-Ala-Asp) box polypeptide 46	DDX46	13	15.2	2.7134	0.04214
IPI00783097	Glycyl-tRNA synthetase	GARS	20	38.6	2.67995	2.43567e-05
IPI00815843	Protein with strong similarity to rat Rpl14	RPL14	4	36.3	2.5661	0.0232039
IPI00029534	Phosphoribosyl pyrophosphate amidotransferase	PPAT	6	20.5	2.56356	0.0438755
IPI00472498	Ubiquitin-conjugating enzyme E2 variant 1	UBE2V1	8	57.1	2.5471	0.0491648
IPI00221088	Ribosomal protein S9	RPS9	11	41.2	2.54094	0.00855663
IPI00909058	BRCA2 and CDKN1A interacting protein	BCCIP	3	17.9	2.54067	0.030747
IPI00007074	Tyrosyl-tRNA synthetase	YARS	21	48.3	2.5378	0.000267379
IPI00847986	Ribosomal protein S24	RPS24	5	36.2	2.51878	0.0451288
IPI00939174	OTU domain ubiquitin aldehyde binding 1	OTUB1	10	50.2	2.51583	0.0355964
IPI00221089	Ribosomal protein S13	RPS13	6	30.5	2.5142	0.0039943
IPI00298696	Treacher Collins-Franceschetti syndrome 1	TCOF1	14	14.6	2.50568	0.00471655
IPI00011913	Heterogeneous nuclear ribonucleoprotein A0	HNRNPA0	9	35.7	2.49708	0.00257702
IPI00005537	Mitochondrial ribosomal protein L12	MRPL12	4	28.8	2.46007	0.0341388
IPI00477179	DEAD-H box polypeptide 21	DDX21	14	28.3	2.42131	0.002045
IPI00012202	WD repeat domain 77	WDR77	9	43.9	2.39852	0.0273837
IPI00027493	Solute carrier family 3 member 2	SLC3A2	21	45.6	2.37726	0.0401079
IPI00642457	Adenine phosphoribosyltransferase	APRT	4	35.1	2.36848	0.0202323
IPI00177728	Cytosolic nonspecific dipeptidase 2	CNDP2	5	18.5	2.36847	0.0404771
IPI00221394	Dyskeratosis congenita 1 dyskerin	DKC1	12	33.1	2.35982	0.0150374
IPI00029091	Protein with very strong similarity to nucleoside diphosphate kinase B (human NME2)	NME2P1	8	66.4	2.33907	0.0179981
IPI00647126	Cleavage and polyadenylation specific factor 6 68kDa	CPSF6	7	22.6	2.31847	0.0489541
IPI00607796	Hematopoietic and neurologic expressed sequence 1-like	HN1L	5	38.2	2.30013	0.0204321
IPI00294879	Ran GTPase activating protein 1	RANGAP1	16	44.6	2.29384	0.0113773
IPI00012772	Ribosomal protein L8	RPL8	9	38.1	2.28982	0.0116395
IPI00025039	Fibrillarin	FBL	6	25.9	2.2802	0.0031492
IPI00910706	Protein of unknown function	ABHD14B	3	24.9	2.27007	0.00931818
IPI00015897	Protein with strong similarity to mouse Chordc1	CHORDC1	10	42.8	2.26319	0.00673681
IPI00027442	Alanyl-tRNA synthetase	AARS	29	41.4	2.246	0.0150044
IPI00783271	Leucine rich PPR motif containing	LRPPRC	52	50.6	2.23734	0.0422977
IPI00003627	Actin-like 6A	ACTL6A	11	41.7	2.23434	0.00316903
IPI00157144	Glycogen synthase 1 muscle	GYS1	4	8.5	2.22744	0.0174235
IPI00220362	Heat shock 10kDa protein 1	HSPE1	8	62.7	2.21828	0.0044583
IPI00303476	ATP synthase H+ transporting mitochondrial F1 complex beta polypeptide	ATP5B	27	73.5	2.19541	0.0403749
IPI00003386	Ring-box 1 E3 ubiquitin protein ligase	RBX1	3	25	2.189	0.0174331
IPI00784154	Heat shock 60kDa protein 1	HSPD1	44	73.8	2.14645	1.36919e-05
IPI00386299	Poly(A) binding protein interacting protein 1	PAIP1	6	23.2	2.13547	0.0278924
IPI00759715	Fumarate hydratase	FH	14	43	2.127	0.003436
IPI00012048	Non-metastatic cells 1 protein expressed in	NME1	10	70.4	2.12644	0.00852892
IPI00479141	SEC13 homolog	SEC13	8	46	2.11992	0.00163736
IPI00001734	Phosphoserine aminotransferase 1	PSAT1	15	44.8	2.11319	0.0128196
IPI00005657	Member of the KE2 gene product family	PFDN6	2	15.5	2.09775	0.0154921
IPI00026167	NHP2 non-histone chromosome protein 2-like 1	NHP2L1	4	32	2.06455	0.0163334
IPI00013297	PDGFA associated protein 1	PDAP1	6	27.1	2.05545	0.0353297
IPI00293655	DEAD (Asp-Glu-Ala-Asp) box polypeptide 1	DDX1	14	29.2	2.05237	0.011901
IPI00414127	Ran binding protein 1	RANBP1	6	54.5	2.04603	0.00202764
IPI00025019	Proteasome (prosome; macropain) subunit beta type 1	PSMB1	8	46.1	2.02995	0.046231
IPI00023048	Eukaryotic translation elongation factor 1 delta	EEF1D	11	54.8	2.02699	0.0335727
IPI00292496	Protein with strong similarity to tubulin beta 2 (human TUBB2C)	TUBB8	11	24.5	2.00124	0.0308643
IPI00937615	Eukaryotic translation elongation factor 1 gamma	EEF1G	21	59.5	1.99101	0.00259967
IPI00239077	Histidine triad nucleotide binding protein 1	HINT1	8	79.4	1.98132	0.0091629
IPI00878876	Small nuclear ribonucleoprotein D3 polypeptide 18kDa	SNRPD3	5	55.8	1.97062	0.00690086
IPI00011603	Proteasome 26S non-ATPase subunit 3	PSMD3	9	21.5	1.96213	0.00448378
IPI00026087	Barrier to autointegration factor 1	BANF1	6	71.9	1.95792	0.0015543
IPI00215879	Serine-arginine-rich splicing factor 6	SFRS6	9	31.2	1.95392	0.0274126
IPI00646689	Thioredoxin domain containing 17	TXNDC17	4	38.2	1.93698	0.00767911
IPI00027831	Glutamate rich WD repeat containing 1	GRWD1	5	19.3	1.93577	0.0335625
IPI00218733	Superoxide dismutase 1 soluble	SOD1	4	57.8	1.92959	0.00672614
IPI00219029	Glutamic oxaloacetic transaminase 1 soluble	GOT1	14	53.5	1.92347	0.024058
IPI00329331	UDP-glucose pyrophosphorylase 2	UGP2	13	35.6	1.91394	0.0176606
IPI00026182	Capping protein (actin filament) muscle Z-line alpha 2	CAPZA2	6	32.9	1.90953	0.0111823
IPI00927458	Ribosomal protein L32	RPL32	8	49.6	1.90405	0.0325884
IPI00008529	Ribosomal protein large P2	RPLP2	8	73.9	1.90336	0.000319359
IPI00032853	NOP10 ribonucleoprotein	NOP10	2	37.5	1.88773	0.0297998
IPI00012493	Ribosomal protein S20	RPS20	5	31.1	1.87602	0.0100988
IPI00396370	Eukaryotic translation initiation factor 3 subunit B	EIF3B	28	47.3	1.86495	0.00155003
IPI00021700	Proliferating cell nuclear antigen	PCNA	11	47.5	1.86344	0.021265
IPI00300371	Splicing factor 3b subunit 3 (130 kDA)	SF3B3	25	26.6	1.84873	0.0125453
IPI00789605	Myosin light chain 6 alkali smooth muscle and non-muscle	MYL6	8	57.9	1.84863	0.00602827
IPI00456758	Ribosomal protein L27a	RPL27A	8	43.5	1.83885	0.00403307
IPI00011250	Ubiquitin carboxyl-terminal esterase L3	UCHL3	7	47.8	1.82664	0.0103341
IPI00916111	Malate dehydrogenase 1 NAD (soluble)	MDH1	9	35.9	1.82562	0.00592707
IPI00029631	Enhancer of rudimentary homolog	ERH	5	46.2	1.82129	0.00661317
IPI00550900	Tumor protein translationally-controlled 1	TPT1	6	38.4	1.81829	0.0151793
IPI00025815	TAR DNA binding protein	TARDBP	7	29.7	1.81703	0.00031851
IPI00334907	Phosphatidylinositol transfer protein beta	PITPNB	4	18.5	1.81022	0.0346787
IPI00383296	Heterogeneous nuclear ribonucleoprotein M	HNRNPM	30	55.6	1.81015	0.000775677
IPI00291510	Inosine 5'-phosphate dehydrogenase 2	IMPDH2	20	49.4	1.80931	0.0378659
IPI00025091	Ribosomal protein S11	RPS11	8	46.8	1.80471	0.0486948
IPI00867533	Ribosomal protein L6	RPL6	15	56.2	1.78206	0.0428477
IPI00021187	RuvB-like 1	RUVBL1	16	52.4	1.77868	0.0160524
IPI00465361	Ribosomal protein L13	RPL13	11	45	1.77446	0.00167083
IPI00300074	Phenylalanyl-tRNA synthetase beta-subunit	FARSB	15	27.8	1.77041	0.0162476
IPI00219219	Lectin galactoside-binding soluble 1	LGALS1	7	64.4	1.76912	0.00216591
IPI00010105	Eukaryotic translation initiation factor 6	EIF6	8	60	1.76749	0.0100947
IPI00026271	Ribosomal protein S14	RPS14	9	41.1	1.76693	0.032108
IPI00012750	Ribosomal protein S25	RPS25	4	24	1.76109	0.00599494
IPI00028091	ARP3 actin-related protein 3 homolog	ACTR3	12	40.9	1.75238	0.000376126
IPI00012007	Adenosylhomocysteinase	AHCY	18	45.1	1.74515	0.0194446
IPI00438229	Tripartite motif-containing 28	TRIM28	27	57.7	1.73914	0.00130644
IPI00017704	Coactosin-like 1 protein	COTL1	8	55.6	1.73678	0.00709725
IPI00220684	Heterogeneous nuclear ribonucleoprotein D	HNRNPD	15	49.7	1.73246	0.00277672
IPI00413324	Ribosomal protein L17	RPL17	8	46.7	1.7313	0.01152
IPI00029997	6-Phosphogluconolactonase	PGLS	3	18.6	1.72823	0.012966
IPI00218988	Adenylate kinase 2	AK2	11	61.2	1.72811	0.0304346
IPI00604620	Nucleolin	NCL	24	31.4	1.72321	0.0031042
IPI00218467	Synuclein alpha	SNCA	6	55.4	1.72097	0.0335522
IPI00396485	Eukaryotic translation elongation factor 1 alpha 1	EEF1A1	25	71.6	1.72096	0.0122457
IPI00218493	Hypoxanthine phosphoribosyltransferase 1	HPRT1	9	56	1.72089	0.0204901
IPI00219153	Ribosomal protein L22	RPL22	5	57	1.71623	0.0254172
IPI00942092	Adenylosuccinate lyase	ADSL	8	26.7	1.71199	0.0138524
IPI00017373	Replication protein A3	RPA3	3	43	1.71132	0.0470625
IPI00017334	Prohibitin	PHB	13	72.4	1.70943	0.00401973
IPI00645078	Ubiquitin-like modifier activating enzyme 1	UBA1	35	47.2	1.70517	0.00475079
IPI00215719	Ribosomal protein L18	RPL18	8	46.5	1.70182	0.0163616
IPI00215780	Ribosomal protein S19	RPS19	9	42.8	1.69616	0.04972
IPI00940148	GDP dissociation inhibitor 2	GDI2	32	75.1	1.69131	0.0146516
IPI00334713	Heterogeneous nuclear ribonucleoprotein A-B	HNRNPAB	11	32.9	1.68771	0.000273151
IPI00032313	S100 calcium binding protein A4	S100A4	5	37.6	1.67837	0.0329939
IPI00641957	Splicing factor arginine serine rich 11	SFRS11	2	6.4	1.67678	0.0452081
IPI00072377	SET nuclear oncogene	SET	11	45.2	1.67546	0.0068036
IPI00021840	Ribosomal protein S6	RPS6	8	32.5	1.67109	0.00109702
IPI00033036	Methionyl aminopeptidase 2	METAP2	13	52.1	1.66341	0.00284842
IPI00477536	Filamin B beta	FLNB	71	41.3	1.65683	0.00636219
IPI00455315	Annexin A2	ANXA2	28	74.3	1.64373	0.00216114
IPI00019502	Myosin heavy chain 9 non-muscle	MYH9	78	46.9	1.64359	0.00194547
IPI00008530	Ribosomal protein P0	RPLP0	16	61.2	1.63473	0.00156596
IPI00943181	Proteasome (prosome macropain) activator subunit 2	PSME2	9	48	1.62209	0.0405518
IPI00030243	Proteaseome (prosome macropain) 28 subunit 3	PSME3	8	33.5	1.62115	0.00714971
IPI00022774	Valosin-containing protein	VCP	37	55.8	1.61777	0.0449058
IPI00216691	Profilin I	PFN1	13	92.1	1.61429	0.0031245
IPI00927101	Ribosomal protein SA	RPSA	16	71.2	1.6087	0.026311
IPI00301058	Vasodilator-stimulated phosphoprotein	VASP	4	16.8	1.60444	0.0135556
IPI00009901	Nuclear transport factor 2	NUTF2	5	68.5	1.60142	0.0422166
IPI00909890	Fused in sarcoma	FUS	8	26.8	1.59949	0.00559696
IPI00339274	Histone cluster 2 H2ac	HIST2H2AC	7	58.1	1.5808	0.00481452
IPI00163187	Fascin homolog 1 actin-bundling protein	FSCN1	23	57.2	1.57817	0.0499277
IPI00304692	RNA binding motif protein X-linked	RBMX	10	24.6	1.57669	0.0109055
IPI00333771	Caldesmon 1	CALD1	13	34.2	1.57403	0.0284634
IPI00843996	Serine-arginine rich splicing factor 3	SFRS3	10	61.3	1.57169	0.0467693
IPI00219446	Phosphatidylethanolamine binding protein 1	PEBP1	12	81.3	1.56663	0.0394216
IPI00398776	Plectin 1	PLEC	138	40.6	1.56305	0.0162295
IPI00643041	RAN member RAS oncogene family	RAN	13	49.5	1.56217	0.0268503
IPI00797270	Triosephosphate isomerase 1	TPI1	18	84.3	1.55835	0.00404635
IPI00909239	Actinin alpha 1	ACTN1	40	58.9	1.55825	0.0254317
IPI00003918	Ribosomal protein L4	RPL4	27	52	1.55353	0.00454866
IPI00302592	Filamin A alpha	FLNA	101	58.1	1.54802	0.00103859
IPI00000874	Peroxiredoxin 1	PRDX1	20	75.9	1.54567	0.00471628
IPI00304163	Chromosome 12 open reading frame 10 (Melanocyte proliferating gene 1)	C12orf10	5	26.3	1.53975	0.0297663
IPI00217296	Protein phosphatase 2A activator regulatory subunit 4	PPP2R4	6	35	1.53957	0.0381557
IPI00411706	Esterase D; exhibits carboxylesterase activity	ESD	8	47.5	1.53913	0.00247413
IPI00412260	Protein of unknown function	CCDC86	2	24.5	1.53571	0.0376368
IPI00216049	Heterogeneous nuclear ribonucleoprotein K	HNRNPK	23	57.7	1.53354	0.0159714
IPI00025329	Ribosomal protein L19	RPL19	6	31.1	1.52911	0.0236335
IPI00007673	Protein of unknown function	CHCHD2	3	33.8	1.52818	0.011145
IPI00418471	Vimentin	VIM	48	82.6	1.52804	0.0136484
IPI00026202	Ribosomal protein L18a	RPL18A	11	46.6	1.52283	0.0191515
IPI00848226	Guanine nucleotide binding protein beta polypeptide 2-like 1	GNB2L1	18	78.2	1.52121	0.00433122
IPI00009104	RuvB-like 2	RUVBL2	15	41.7	1.51837	0.00983592
IPI00220447	Transformer 2 alpha homolog	TRA2A	2	12.8	1.51824	0.0272389
IPI00100716	Poly-U binding splicing factor 60KDa	PUF60	12	37.1	1.51782	0.0353316
IPI00007752	Tubulin beta 2	TUBB2C	26	74.8	1.51616	0.0129838
IPI00015018	Pyrophosphatase 1	PPA1	18	83	1.51495	0.01915
IPI00549725	Phosphoglycerate mutase 1	PGAM1	11	49.6	1.5137	0.0233047
IPI00171199	Proteasome subunit alpha type 3	PSMA3	8	35.1	1.51263	0.0449924
IPI00219156	Ribosomal protein L30	RPL30	4	51.8	1.51046	0.0351999
IPI00021263	Tyrosine 3-monooxygenase-tryptophan 5-monooxygenase activation protein zeta polypeptide	YWHAZ	18	69.8	1.50938	0.0369104
IPI00927715	Ribosomal protein L15	RPL15	6	41.4	1.50765	0.0363306
IPI00383581	Glucosidase alpha neutral AB	GANAB	36	50.9	1.5031	0.0168755
Down-regulated proteins
IPI00022462	Transferrin receptor	TFRC	15	26.6	-1.54431	0.0150693
IPI00790702	Adaptor-related protein complex 2 beta 1 subunit	AP2B1	18	27.3	-1.82195	0.0319135
IPI00234252	SWI-SNF complex 155 kDa subunit	SMARCC1	9	14.2	-1.85561	0.0104656
IPI00002214	Karyopherin alpha 2	KPNA2	9	29.9	-2.23213	0.00178853
IPI00013933	Desmoplakin	DSP	32	17.3	-6.6628	0.00508273
